# Supplementary material
Source: Springer Nature journal article supplement (https://www.springermedizin.de/resource/supplementary/12913_2007_586_MOESM2_ESM.pdf/9535462)
Supplement: MOESM2 [file 9535462]

Studies randomly selected  
**N=1500**

No e-mail address, N=184  
E-mail address invalid, N=17

Principal investigators successfully invited  
**N=1299**

No response, N=1017

Participation in the survey  
**N=282**
